# Supplementary material for: Construction of a magnetic Z-scheme photocatalyst with enhanced oxidation/reduction abilities and recyclability for the degradation of tetracycline
Source: Royal Society of Chemistry journal article supplement (doi:10.1039/c6ra24096h), 2016-01-01
Supplement: c6ra24096h1.pdf [file c6ra24096h1.pdf]

## Electronic Supplementary Information

### Construction of magnetic Z-scheme photocatalyst for enhanced the oxidation/reduction ability and recyclable availability on degradation of tetracycline

Zihong Pan<sup>a\*</sup>, Wei Ma<sup>a</sup>, Li Wang<sup>a</sup>

a. School of Chemical and Environmental Engineering, Pingdingshan University, China

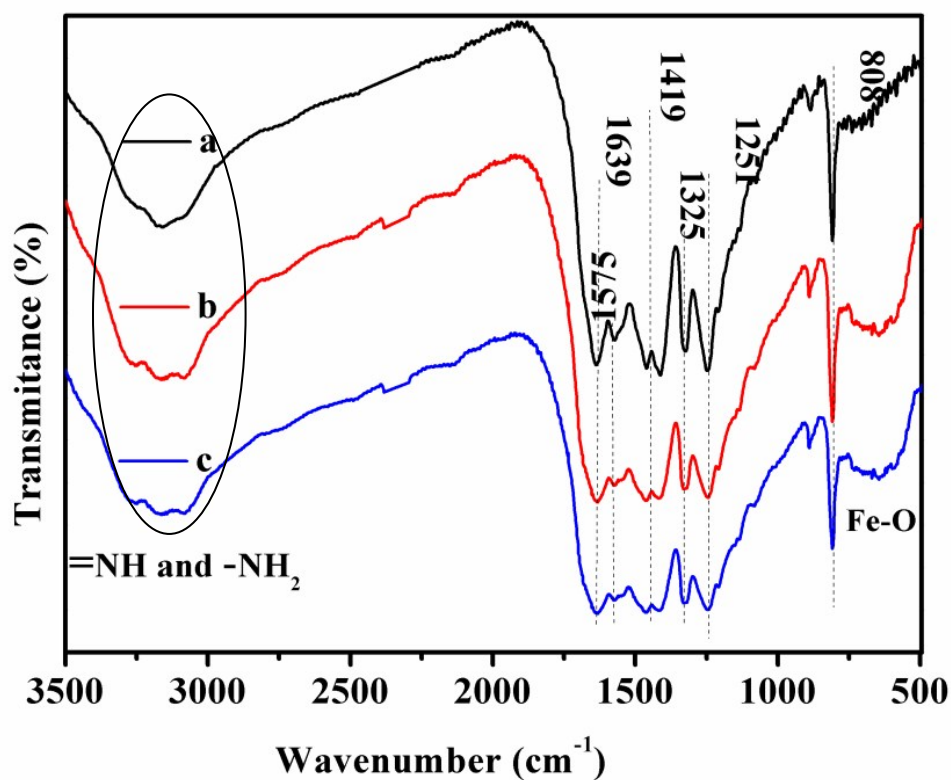

Fig. S1 FT-IR spectra of g-C<sub>3</sub>N<sub>4</sub> (a), Fe<sub>3</sub>O<sub>4</sub>/g-C<sub>3</sub>N<sub>4</sub> (b), WO<sub>3</sub>/Fe<sub>3</sub>O<sub>4</sub>/g-C<sub>3</sub>N<sub>4</sub> (c)

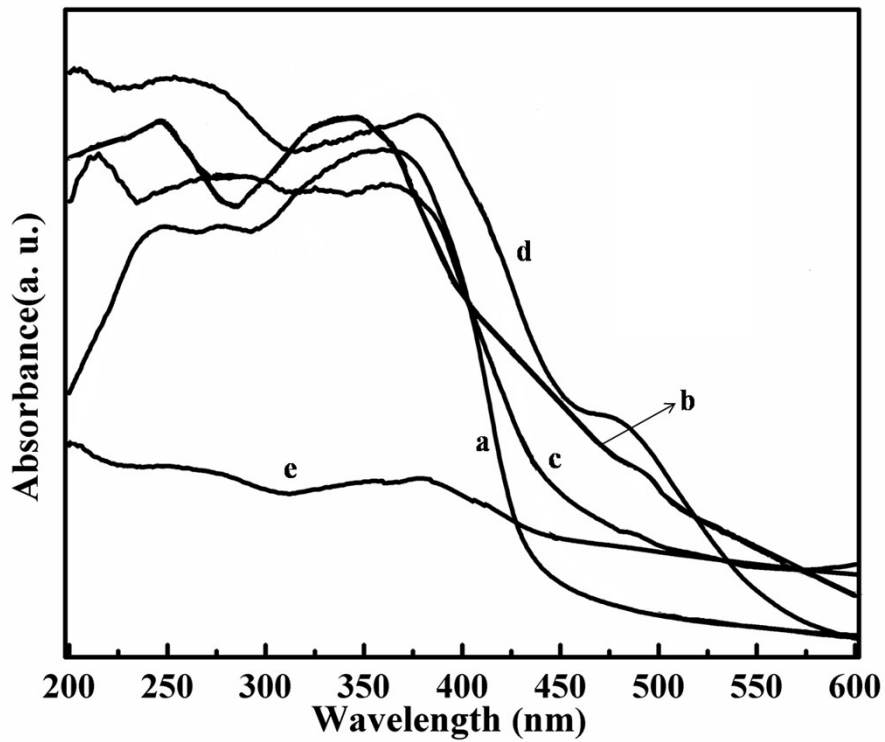

Fig. S2 UV-vis absorbance spectra of  $\text{Fe}_3\text{O}_4/\text{g-C}_3\text{N}_4$  with different  $\text{Fe}_3\text{O}_4$  content: 40 wt.%, 20 wt.%, 10 wt.%, 5.0 wt.%, and 3.0 wt.%;

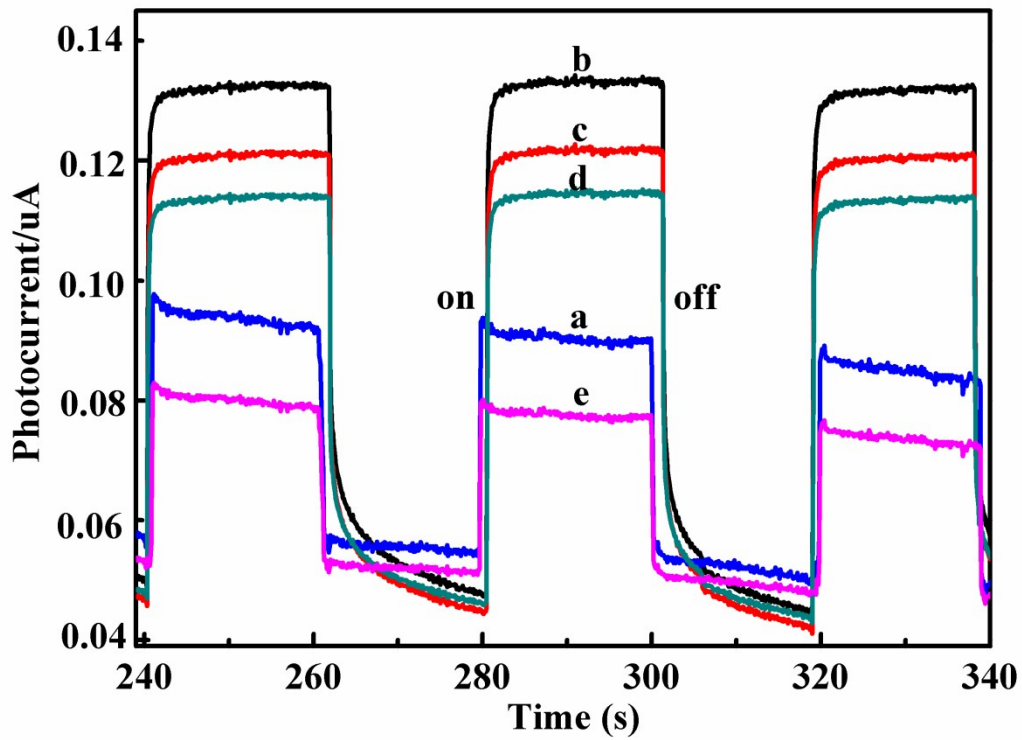

Fig. S3 Photocurrent response curves of  $\text{WO}_3/\text{Fe}_3\text{O}_4/\text{g-C}_3\text{N}_4$  with different  $\text{WO}_3$  content, 0.5 wt.% (a), 1.0 wt.% (b), 2.0 wt.%(c), 5.0 wt.% (d), 10 wt.%(e)

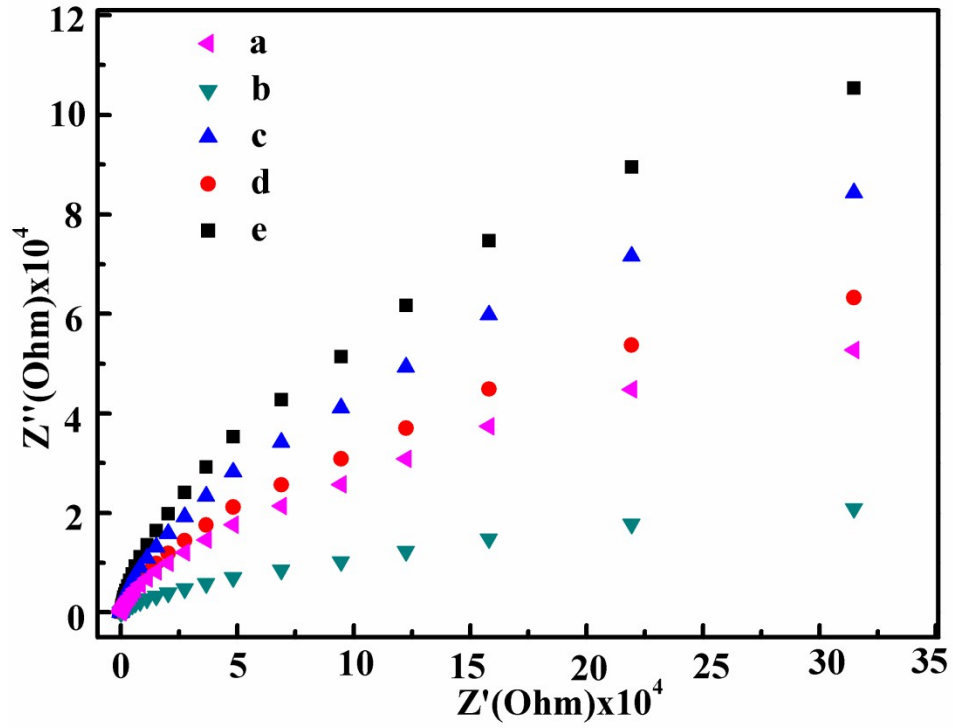

Fig. S4 EIS spectra of  $\text{WO}_3/\text{Fe}_3\text{O}_4/\text{g-C}_3\text{N}_4$  with different  $\text{WO}_3$  content, 0.5 wt.% (a), 1.0 wt.% (b), 2.0 wt.%(c), 5.0 wt.% (d), 10 wt.%(e)

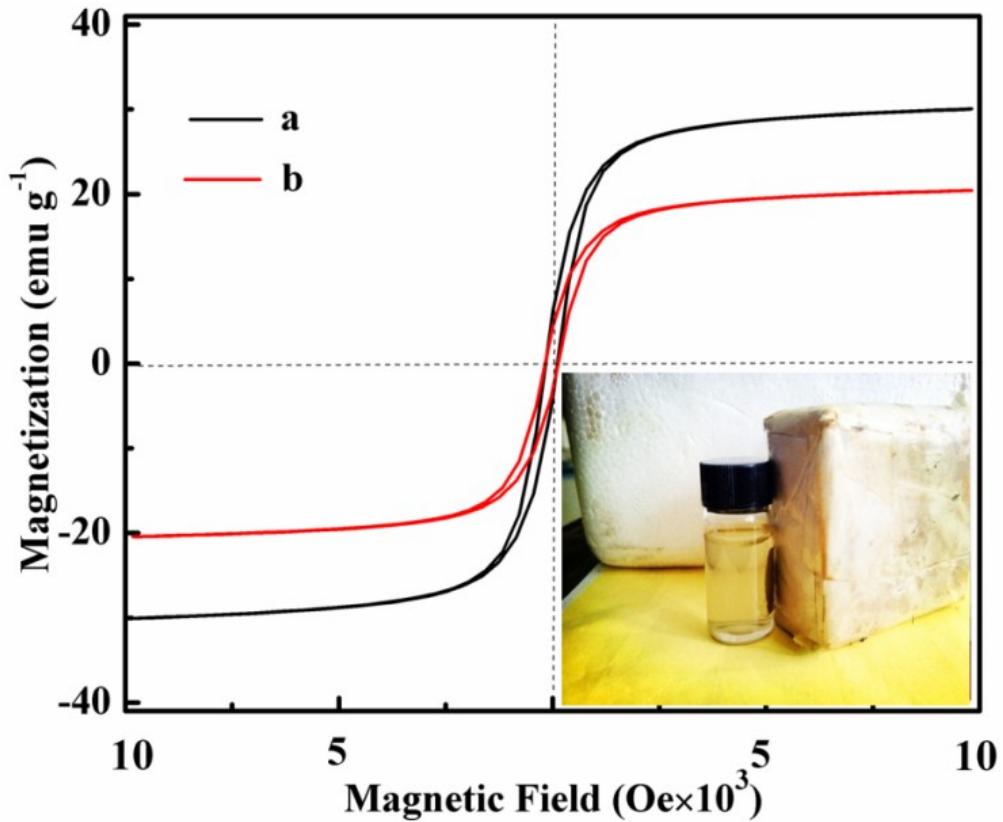

Fig. S5 Hysteresis loops of  $\text{Fe}_3\text{O}_4/\text{g-C}_3\text{N}_4$  (a),  $\text{WO}_3/\text{Fe}_3\text{O}_4/\text{g-C}_3\text{N}_4$  (b), inset image is  $\text{WO}_3/\text{Fe}_3\text{O}_4/\text{g-C}_3\text{N}_4$  attracted by magnetic field

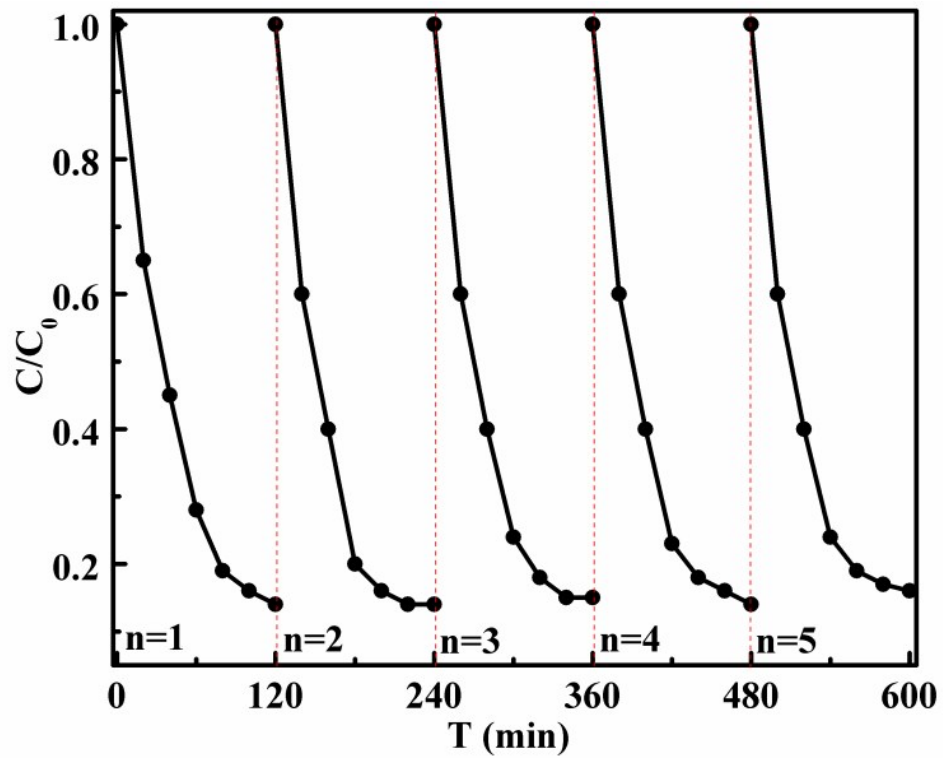

Fig. S6 Recyclability of  $\text{WO}_3/\text{Fe}_3\text{O}_4/\text{g-C}_3\text{N}_4$  for degradation of tetracycline
